<sup>1</sup> Manuscript submitted to *Biophysical Journal*

## <sup>2</sup> Article

# <sup>3</sup> Intermediate adhesion maximizes fluidity and migration <sup>4</sup> velocity of multicellular clusters

<sup>5</sup> U. Roy, A. Mugler

<sup>6</sup> **ABSTRACT** Collections of cells exhibit coherent migration during morphogenesis, cancer metastasis, and wound healing. In  
<sup>7</sup> many cases, bigger clusters split, smaller sub-clusters collide and reassemble, and gaps continually emerge. The connections  
<sup>8</sup> between cell-level adhesion and cluster-level dynamics, as well as the resulting consequences for cluster properties such as  
<sup>9</sup> migration velocity, remain poorly understood. Here we investigate collective migration of one- and two-dimensional cell clusters  
<sup>10</sup> that collectively track chemical gradients using a mechanism based on contact inhibition of locomotion. We develop both a  
<sup>11</sup> minimal description based on the lattice gas model of statistical physics, and a more realistic framework based on the cellular  
<sup>12</sup> Potts model which captures cell shape changes and cluster rearrangement. In both cases, we find that cells have an optimal  
<sup>13</sup> adhesion strength that maximizes cluster migration speed. The optimum negotiates a tradeoff between maintaining cell-cell  
<sup>14</sup> contact and maintaining cluster fluidity, and we identify maximal variability in the cluster aspect ratio as a revealing signature.  
<sup>15</sup> Our results suggest a collective benefit for intermediate cell-cell adhesion.

<sup>16</sup> **SIGNIFICANCE** Cells have been observed to migrate faster and more efficiently in clusters than as individuals. We  
<sup>17</sup> conjecture that adhesion among cells and with the extracellular environment plays an important role in achieving higher  
<sup>18</sup> speed for the entire cluster. We carry out our analyses analytically and computationally, by employing a simplistic one-  
<sup>19</sup> dimensional model and a realistic two-dimensional model which capture the essential features of multicellular migration.  
<sup>20</sup> Our study demonstrates that an optimal cell-cell adhesion, which corresponds to maximal cellular rearrangement and loose  
<sup>21</sup> packing, leads to a higher migration velocity for a multicellular cluster, acting as a crucial factor in effective movement of a  
<sup>22</sup> collection of cells in a coordinated and directed fashion.

## <sup>23</sup> INTRODUCTION

<sup>24</sup> Collective cell migration is of critical importance in nearly  
<sup>25</sup> all stages of life (1). Biological processes like embryoge-  
<sup>26</sup> nesis, morphogenesis, neurogenesis, regeneration, wound  
<sup>27</sup> healing, and disease propagation such as cancer metastasis  
<sup>28</sup> involve numerous cells acting in a coordinated way (1–3).  
<sup>29</sup> Studies have demonstrated that multicellular clusters can  
<sup>30</sup> sense chemoattractants more efficiently and precisely than  
<sup>31</sup> their isolated constituent cells do (4, 5). Sensory information  
<sup>32</sup> is combined with mechanochemical mechanisms, including  
<sup>33</sup> actin polymerization and contact-dependent polarity (known  
<sup>34</sup> as contact inhibition of locomotion, CIL) (4, 6), to pro-  
<sup>35</sup> duce directional migration. Recent studies have indicated that  
<sup>36</sup> cadherin- and integrin-based adhesions at cell-cell junctions  
<sup>37</sup> and cell-extracellular matrix (ECM) contacts respectively are  
<sup>38</sup> indispensable for migration of multicellular clusters (1, 7, 8).  
<sup>39</sup> Cell-cell and cell-ECM adhesion are integrated with actin  
<sup>40</sup> dynamics to keep clusters together during collective cell  
<sup>41</sup> migration (1, 9).

<sup>42</sup> Collective migration presents a mechanical tradeoff, as  
<sup>43</sup> cells must negotiate a balance between displacing themselves  
<sup>44</sup> with respect to the ECM, but not separating themselves from  
<sup>45</sup> other cells. In many cases this results in clusters that are

<sup>46</sup> dynamic and loosely packed rather than rigidly structured. For  
<sup>47</sup> example, in the case of neural crest cells, a group of pluripo-  
<sup>48</sup> tent cells in all vertebrate embryos that can migrate very long  
<sup>49</sup> distances, bigger clusters split, smaller sub-clusters collide  
<sup>50</sup> and reassemble, and gaps continually appear and disappear  
<sup>51</sup> (4, 10). This raises the question of whether there is an interme-  
<sup>52</sup> diate, rather than very strong or weak, adhesion strength that  
<sup>53</sup> optimally negotiates this tradeoff and results in dynamic loose  
<sup>54</sup> clustering and maximally efficient collective migration. Cell  
<sup>55</sup> adhesion is clearly crucial to collective migration, but the  
<sup>56</sup> mechanisms are not yet well understood.

<sup>57</sup> Here we use mathematical modeling and simulation to in-  
<sup>58</sup> vestigate the role of cell-cell and cell-ECM adhesion strength  
<sup>59</sup> in determining collective migration efficiency and the con-  
<sup>60</sup> comitant effects on cluster shape and dynamics. Rather than  
<sup>61</sup> focusing on the details of the mode of action or molecular  
<sup>62</sup> properties of different types of adhesion molecules, we de-  
<sup>63</sup> velop a generic model which explores the different regimes  
<sup>64</sup> of adhesion strength, so that we may have a general under-  
<sup>65</sup> standing of the phenomena. We start with a one-dimensional  
<sup>66</sup> model based on the lattice gas model of statistical physics (11)  
<sup>67</sup> that allows us to analytically probe the collective migration  
<sup>68</sup> velocity of a linear chain of cells as a function of adhesion

U. Roy and A. Mugler

69 strength. We then extend this model to two dimensions using  
70 the cellular Potts model (12–14), which more realistically  
71 captures cell shape, cluster rearrangement, and other essential  
72 aspects of cluster migration.

73 Numerical results from both the one- and the two-dimensional  
74 model suggest the existence of an intermediate adhesion  
75 strength among cells that leads to the fastest migration of  
76 a multicellular cluster. Specifically, there exists a regime of  
77 intercellular and cell-ECM adhesion strengths which corre-  
78 sponds to optimally effective migration. We demonstrate that,  
79 in this regime, the clusters possess the maximal rearrange-  
80 ment capacity while remaining as a connected cluster, rather  
81 than falling apart and scattering into single isolated cells or  
82 strongly sticking together as a compact structure.

## 83 METHODS

84 We first consider a simplified one-dimensional model for  
85 collective migration based on the lattice gas model of statistical  
86 physics, and then a more realistic two-dimensional model  
87 based on the cellular Potts model. Here we first review the  
88 lattice gas model (later, in the Results section, we discuss  
89 our new calculations using this model, as well as our own  
90 modifications to it). We then present the model details of the  
91 cellular Potts model.

### 92 One-dimensional lattice gas model

93 We first investigate a one-dimensional collective of cells using  
94 the lattice gas model. Consider  $N$  cells arranged in a one-  
95 dimensional lattice of  $V$  sites with  $V \geq N$  (Fig. 1A).  $\sigma_i$   
96 denotes the state of each lattice site  $i$ .  $\sigma_i = 1$  represents a cell  
97 while ECM is labeled by  $\sigma_i = 0$ .

98 Assume that interaction exists only between adjacent cells;  
99 the total energy for a given configuration of cells  $\{\sigma_i\}$  can  
100 then be expressed as

$$E_{LG} = -\epsilon \sum_{i=1}^V \sigma_i \sigma_{i+1} \quad (1)$$

101 where  $-\epsilon$  is the interaction energy between two adjacent  
102 cells representing their adhesion. We impose  $\sigma_{V+1} = \sigma_1$  for  
103 periodicity and  $\sum_{i=1}^V \sigma_i = N$  to conserve cell number.

104 The grand partition function for the lattice gas is

$$\Xi_{LG} = \sum_{N=0}^V z^N Z_{LG} \quad (2)$$

105 where  $Z_{LG} = \sum_{\{\sigma_i\}} e^{-\beta E_{LG}}$  is the canonical partition func-  
106 tion,  $z = e^{\beta\mu}$  is the fugacity parameter, with  $\beta = (k_B T)^{-1}$  and  
107  $\mu$  denoting the chemical potential. The inverse of Eq. (2) is

$$Z_{LG} = \frac{1}{N!} \frac{\partial^N}{\partial z^N} \Xi_{LG}. \quad (3)$$

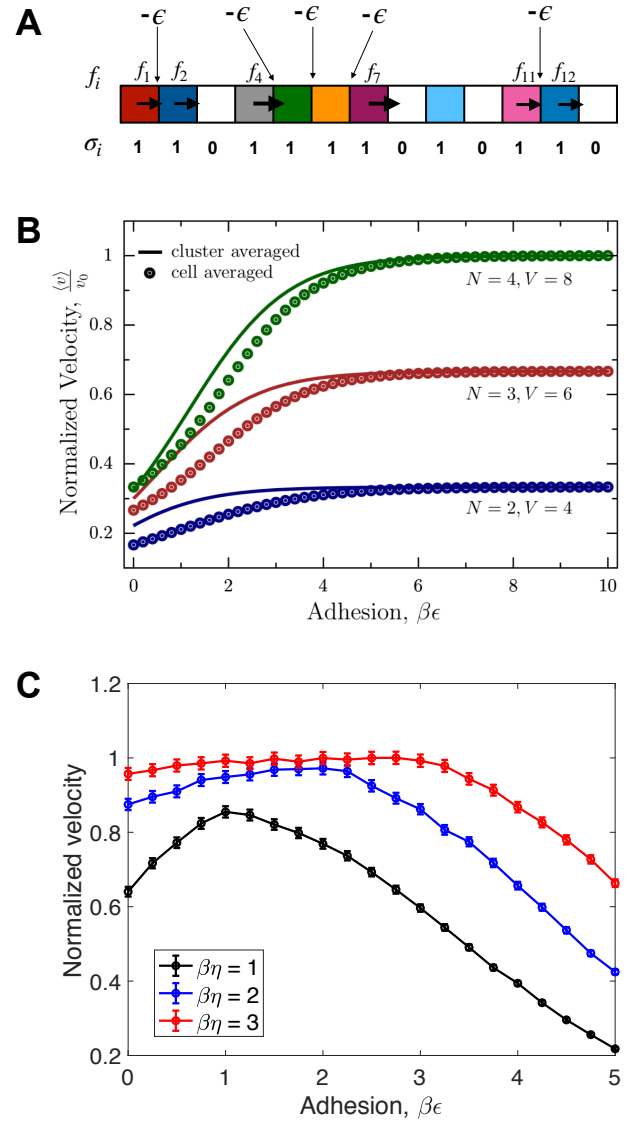

Figure 1: **Velocity vs. adhesion for one-dimensional collective cell migration.** A. Schematic showing a collection of cells (colors,  $\sigma_i = 1$ ) and ECM (white,  $\sigma_i = 0$ ) arranged in a linear chain. Each pair of cells has an interaction energy  $-\epsilon$ . Arrows indicate motility force  $f_i$ . B. Normalized velocity  $\langle v \rangle / v_0$  as a function of adhesion  $\beta\epsilon$  for the undriven model, Eq. (1). C. Normalized velocity as a function of adhesion  $\beta\epsilon$  for the driven model, Eq. (16).

108 Inserting Eq. (1) into Eq. (2) and exploiting the fact that  
 109  $N = \sum_{i=1}^V \sigma_i$ , Eq. (2) can be recast as

$$\Xi_{LG} = \sum_{\{\sigma_i\}} \exp \left( \beta \epsilon \sum_{i=1}^V \sigma_i \sigma_{i+1} + \beta \mu \sum_{i=1}^V \sigma_i \right). \quad (4)$$

110 We now recognize that the grand partition function of the  
 111 lattice gas model as expressed in Eq. (4) has the same form as  
 112 the canonical partition function of the Ising model (11, 15).  
 113 Specifically, relating the  $\sigma_i \in \{0, 1\}$  to Ising spin variables  
 114  $s_i \in \{-1, 1\}$  via  $\sigma_i = (s_i + 1)/2$ , Eq. (4) reads

$$\Xi_{LG} = Z_I e^{\beta \mu V/2} e^{\beta \epsilon V/4}, \quad (5)$$

115 where  $Z_I$  is the canonical partition function of the Ising  
 116 model with magnetic field  $H = (\epsilon + \mu)/2$  and coupling energy  
 117  $J = \epsilon/4$ .

118 The canonical partition function of the Ising model is  
 119 exactly solvable in one dimension and reads

$$Z_I = \lambda_+^V + \lambda_-^V \quad (6)$$

120 for a periodic chain, where

$$\lambda_{\pm} = e^{\beta J} \cosh(\beta H) \pm \sqrt{e^{2\beta J} \sinh^2(\beta H) + e^{-2\beta J}}. \quad (7)$$

121 Thus, Eqs. (3) and (5)-(7) constitute an analytic expression  
 122 for the canonical partition function of the lattice gas model.  
 123 We use this fact to calculate the cluster migration velocity in  
 124 the Results section.

## 125 Two-dimensional cellular Potts model

126 To more realistically model cluster migration in two dimen-  
 127 sions, we use computer simulation. Many cellular automata  
 128 models have been developed for this task (16–18); we use  
 129 the cellular Potts model (CPM) (19, 20). The CPM captures  
 130 realistic properties such as changes in cell shape and cell  
 131 size, rearrangement of cells within a cluster, and the dynamic  
 132 breakup or re-aggregation of sub-clusters. Diverse biological  
 133 phenomena like chemotaxis, cell sorting, endothelial cell  
 134 streaming, tumor invasion and cell segregation have been  
 135 modeled using the CPM (19, 21, 22).

136 We have considered a discrete two-dimensional lattice.  
 137 Each cell is represented by a group of lattice sites  $x$  with the  
 138 same integral values for their lattice labels  $\sigma(x) > 0$  (Fig. 2).  
 139 The empty lattice sites correspond to the extra-cellular matrix  
 140 (ECM), with lattice label  $\sigma(x) = 0$ , providing an environment  
 141 through which the cells move. The initial configuration has  
 142 several cells arranged in a single cluster. The energy of the  
 143 whole system  $E_{CPM}$  has contributions from two factors: the  
 144 first one is the adhesion while the second one is the area  
 145 restriction term,

$$E_{CPM} = \sum_{\langle x, x' \rangle} J_{\sigma(x), \sigma(x')} + \sum_{i=1}^N \lambda_A (\delta A_i)^2. \quad (8)$$

146 The adhesion energy term  $J_{\sigma(x), \sigma(x')}$  is given by the following  
 147

$$J_{\sigma(x), \sigma(x')} = \begin{cases} 0 & \sigma(x)\sigma(x) \geq 0 & \text{within ECM or same cell,} \\ \alpha & \sigma(x)\sigma(x') = 0 & \text{cell-ECM contact,} \\ \gamma & \sigma(x)\sigma(x') > 0 & \text{cell-cell contact.} \end{cases} \quad (9)$$

148  $\alpha$  denotes the interaction strength of any cell due to adhe-  
 149 sion with its environment while intercellular adhesiveness is  
 150 characterized by  $\gamma$ . A migrating cell is refrained from grow-  
 151 ing or shrinking to unphysical sizes, as well as branching or  
 152 stretching into unphysical shapes, due to the presence of the  
 153 area restriction term in Eq. (8). Cells undergo fluctuations  
 154 in size  $\delta A_i$  around a desired area  $A_0$  via  $\delta A_i \equiv A_i(t) - A_0$ .  
 155 We have set  $\lambda_A$  to be unity (23). Previous work (12–14, 23)  
 156 has included a perimeter restriction term in addition to the  
 157 area restriction term. For simplicity we omit this term, as  
 158 we find that sufficiently large  $\alpha$  and  $\gamma$  constrain perimeter by  
 159 cell-ECM or cell-cell contact.

160 Our model of migration is based on contact inhibition of  
 161 locomotion (CIL), a well known and central mechanism of  
 162 collective cell movement (6). The formation of cell protrusions  
 163 is locally inhibited when a cell comes into contact with another  
 164 cell, and hence the cell ceases to move in that direction. Instead,  
 165 the cell generates protrusions away from the site of contact  
 166 (24, 25), which produces force in the outward direction. Direct  
 167 evidence of CIL has been observed in migrating clusters,  
 168 where outer cells have strong outward polarization while inner  
 169 cells weakly protrude (4). Note that under this mechanism,  
 170 directional migration is purely collective: two or more cells  
 171 in contact are polarized, whereas single isolated cells are not.

172 We consider the case where cells exist in an external  
 173 chemical gradient. *Drosophila* egg chamber cells (26–29),  
 174 clusters of lymphocytes (30), neural crest cells (4), and ep-  
 175 ithelial organoids (5) exhibit emergent gradient sensing and  
 176 collective migration in response to graded chemical cues.  
 177 Under the assumption that the chemical concentration influ-  
 178 ences the magnitude of the protrusive forces, the presence  
 179 of a chemical gradient creates a force imbalance (31, 32),  
 180 allowing the cluster to respond to the gradient. However, as a  
 181 cluster migrates up a gradient according to this mechanism,  
 182 the background concentration increases, which increases the  
 183 outward forces and can cause the cluster to scatter (31). To pre-  
 184 vent scattering, we adopt an adaptive mechanism of gradient  
 185 sensing (5, 23, 31), in which cells respond to the difference  
 186 between the local chemical concentration and the average  
 187 experienced over the entire cluster. Evidence for adaptive  
 188 collective gradient sensing has been observed in epithelial  
 189 organoids (5).

190 Specifically, we take the magnitude of the force experi-  
 191 enced by cell  $i$  to be

$$F_i = \eta g (x_{cm}^i - x_{csm}) \quad (10)$$

192 where  $\eta$  sets the force strength,  $g$  is the concentration gradient  
 193 which is in the  $x$  direction (downward in Fig. 2 and subsequent

U. Roy and A. Mugler

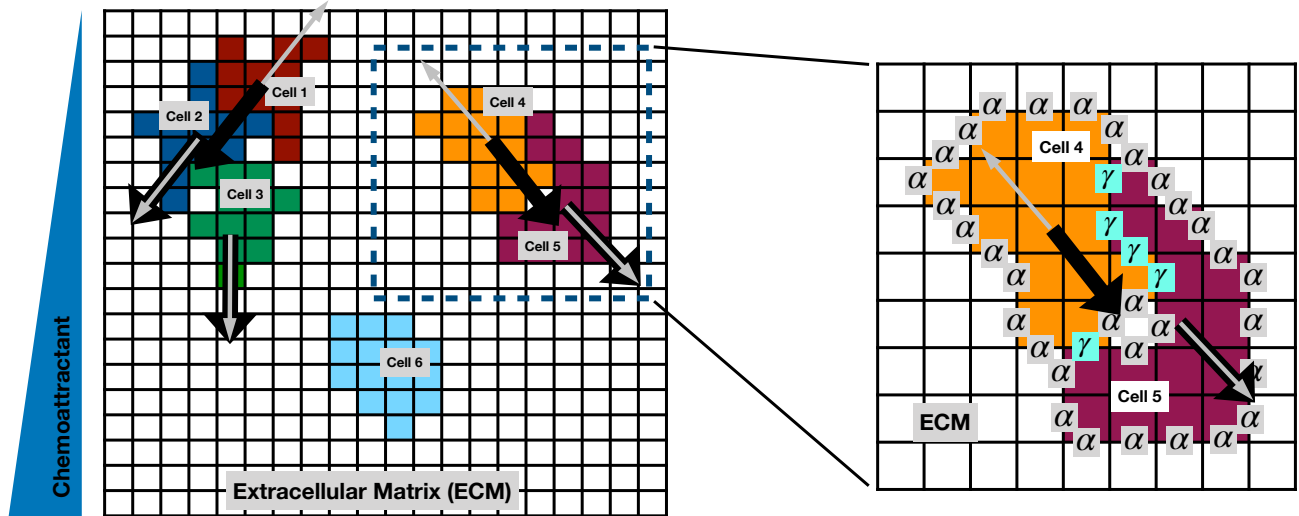

Figure 2: **Cellular Potts model for collective migration in a chemical gradient.** A schematic of the adaptive cellular Potts model (CPM) depicting a characteristic snapshot of three multicellular clusters of different sizes. The cluster consisting of two cells, enclosed within a dashed box (left), is zoomed (right) to show cell-cell energy penalty  $\gamma$  and cell-ECM energy penalty  $\alpha$ . All cells have respective motility force vectors (black arrows) and repulsion vectors (gray arrows; away from cell-cell contact as a result of CIL) in a linear chemoattractant gradient. A single isolated cell (cell 6) has no force acting on it since we have considered CIL as our guiding mechanism for motility.

194 figures),  $x_{cm}^i$  and  $x_{ccm}$  are the  $x$  coordinates of the center-of-  
 195 mass of the cell and of the whole cluster respectively, and  
 196 the subtraction expresses the adaptivity. We set  $\eta g = 1$  in  
 197 this work. The direction of the force experienced by cell  
 198  $i$  is determined according to CIL (23): we sum all vectors  
 199 pointing from cell-pixels in contact with any other cell to the  
 200 center-of-mass of cell  $i$ . This net ‘repulsion’ vector points  
 201 outward (gray in Fig. 2), whereas the force direction is flipped  
 202 when the sign of Eq. (10) is negative (black in Fig. 2). The  
 203 forces contribute a work term to the energy functional, given  
 204 by

$$W = - \sum_{i=1}^N \vec{F}_i \cdot \Delta \vec{x}_i, \quad (11)$$

205 where  $\Delta \vec{x}_i$  is the change in the center-of-mass of each cell  
 206 upon a configurational change, discussed next.

207 Given the energy and work terms, cellular dynamics under  
 208 the CPM are simulated using a Monte Carlo process which  
 209 is based on the principle of minimizing the energy of the  
 210 whole system. Specifically, motility is modeled by an addition  
 211 (copying the identity of one cell-pixel, chosen randomly, to  
 212 its neighboring site) or removal (copying an ECM-pixel to  
 213 a site previously occupied by cell) of pixels. Each Monte  
 214 Carlo step selects randomly a pair of adjacent lattice sites, and  
 215 attempts to copy the identity of one to the other. It calculates  
 216 the energy of the previous (before copying) and the new (after  
 217 copying) configuration. The new configuration is accepted

218 with probability  $P$ , given by

$$P = \begin{cases} e^{-(\Delta E_{CPM} + W)} & \Delta E_{CPM} + W \geq 0 \\ 1 & \Delta E_{CPM} + W < 0, \end{cases} \quad (12)$$

219 where  $\Delta E_{CPM}$  is the change in energy of the system due to  
 220 the attempted move, calculated from Eq. (8), and  $W$  is the  
 221 bias term given by Eq. (11).

## 222 RESULTS

### 223 Driven lattice gas model exhibits optimal 224 cell-cell adhesion

225 We first consider the one-dimensional lattice gas model (Methods) and ask how the average cell velocity depends on the adhesion strength. As in the CPM described above, we assume that the force ( $f_i$  in Fig. 1A) is exerted by the edge cells due to CIL and is proportional to the local concentration of an external chemical. In one dimension, there are only two edge cells per sub-cluster of at least two cells (single isolated cells experience no contacts and therefore no force). In a linear chemical profile, the net force will be proportional to the linear extent of the sub-cluster, equivalent to the number of cell-cell contacts. Assuming that the velocity is proportional to the force (appropriate at low Reynolds number), the velocity of a sub-cluster can be expressed as  $v_0 \sum_i \sigma_i \sigma_{i+1}$ , where the sum extends over the indices of the sub-cluster, and  $v_0$  is an arbitrary constant that sets the velocity scale. The average

240 velocity over all sub-clusters in a particular configuration  $\{\sigma_i\}$   
 241 is the sum of all such terms divided by the total number of  
 242 sub-clusters, or

$$v = \frac{v_0 \sum_{i=1}^V \sigma_i \sigma_{i+1}}{\sum_{i=1}^V \sigma_i (1 - \sigma_{i+1})} = -\frac{v_0 E_{LG}}{\epsilon N + E_{LG}}. \quad (13)$$

243 Here the denominator counts sub-clusters by their rightmost  
 244 edges, and the second step recalls Eq. (1). We have chosen to  
 245 weight each cluster equally in Eq. (13) for analytic tractability,  
 246 but we will see that similar results are obtained if each cell is  
 247 weighted equally instead, as in later Results sections.

248 The average velocity is the sum of Eq. (13) against the  
 249 Boltzmann probability,

$$\langle v \rangle = \sum_{\{\sigma_i\}} \frac{-v_0 E_{LG}}{\epsilon N + E_{LG}} \times \frac{e^{-\beta E_{LG}}}{Z_{LG}} = \frac{v_0}{Z_{LG}} \sum_{n=0}^{\infty} \left( \frac{\partial \beta}{\epsilon N} \right)^n Z_{LG}. \quad (14)$$

250 The second step recognizes that  $n$  derivatives of the partition  
 251 function extract  $n$  powers of  $-E_{LG}$ , which when summed as  
 252 a geometric series are equivalent to the first expression. Eq.  
 253 (14) connects the average velocity with the canonical partition  
 254 function of the lattice gas, for which we have an analytic  
 255 expression (Methods).

256 Eq. (14) depends on the size of the lattice  $V$ , the number of  
 257 cells  $N$ , the velocity scale  $v_0$ , and the dimensionless adhesion  
 258 energy  $\beta\epsilon$ . Therefore, we can ask for a given  $V$  and  $N$ , how the  
 259 normalized velocity  $\langle v \rangle / v_0$  depends on the adhesion strength  
 260  $\beta\epsilon$ . As an example, for  $V = 8$  and  $N = 4$ , Eq. (14) evaluates  
 261 to

$$\frac{\langle v \rangle}{v_0} = \frac{4e^{\beta\epsilon} + 18e^{2\beta\epsilon} + 12e^{3\beta\epsilon}}{1 + 12e^{\beta\epsilon} + 18e^{2\beta\epsilon} + 4e^{3\beta\epsilon}}. \quad (15)$$

262 We see in Fig. 1B (green curve) that  $\langle v \rangle / v_0$  is a monotonically  
 263 increasing function of  $\beta\epsilon$ .

264 In general we find analytically that velocity increases  
 265 monotonically with adhesion strength for other values of  
 266  $N$  and  $V$ , and also numerically when cells are weighted  
 267 equally in the average (Fig. 1B). This would imply that the  
 268 optimal adhesion is infinitely strong. However, thus far, this  
 269 model neglects the impact of the motility process itself on the  
 270 probability of occurrence of each configuration  $\{\sigma_i\}$ . That  
 271 is, the probability is determined entirely by the Boltzmann  
 272 distribution, which depends only on the adhesion energy.  
 273 Instead, we expect that the motility forces will influence the  
 274 ensemble of configurations, as some configurations that are  
 275 driven by collective movement will occur more frequently  
 276 than they would in the undriven system.

277 To account for the influence of motility on the configura-  
 278 tion ensemble, we add a driving term to the energy function  
 279 that is proportional to the motility forces. Specifically, we  
 280 consider the change in energy to be of the following form,

$$\Delta E = \Delta E_{LG} - \eta f_i \Delta x. \quad (16)$$

281 Here  $\Delta E$  is the change in energy when cell  $i$  shifts to a neigh-  
 282 boring lattice position.  $\Delta E_{LG}$  is the change in the adhesion

283 energy according to Eq. (1), while  $-\eta f_i \Delta x$  is the work that  
 284 occurs when the change in cell position  $\Delta x$  aligns with the  
 285 motility force  $f_i$ . The latter term is analogous to the work  
 286 term in the CPM, Eq. (11). The sign of this term reflects the  
 287 fact that the motility forces on both ends of the cluster point  
 288 in the gradient direction, due to the adaptivity (see Methods  
 289 for details). We continue to take  $f_i = n - 1$  to be the number  
 290 of connected edges in the sub-cluster of size  $n$ , and  $\eta$  sets the  
 291 strength of the motility. Note that  $\eta = 0$  corresponds to the  
 292 undriven ensemble as before.

293 We evolve the system via Monte Carlo simulation as in the  
 294 CPM (Methods). We randomly choose a pair of non-identical  
 295 neighboring sites, i.e., a cell and an ECM site, and swap them,  
 296 calculate the energy change following Eq. (16), and accept  
 297 the new configuration with Boltzmann probability  $e^{-\beta \Delta E}$ .  
 298 The center-of-mass velocity averaged over many instances is  
 299 shown in Fig. 1C for different values of  $\beta\eta$ . We observe in all  
 300 cases that there is a clear optimum in the adhesion strength for  
 301 which the cluster has the maximum migration velocity. We  
 302 conclude that the effect of motility is to bias the ensemble of  
 303 configurations away from its equilibrium distribution, which  
 304 is necessary to observe an optimal adhesion strength.

305 The optimal adhesion strength arises due to the following  
 306 tradeoff. On the one hand, weak adhesion results in isolated  
 307 cells that diffuse without bias, except when they happen to col-  
 308 lide and briefly attain a bias due to the CIL. On the other hand,  
 309 strong adhesion causes the first term in Eq. (16) to dominate  
 310 over the second, suppressing movement of cells at the leading  
 311 edges of sub-clusters, and therefore suppressing movement as  
 312 a whole. The optimal adhesion strength negotiates the balance  
 313 between the two, resulting in clusters that are tight enough to  
 314 cohere but fluid enough to allow forward progress.

315 The one-dimensional model considered thus far captures  
 316 the core physics of an optimal adhesion strength but necessarily  
 317 neglects changes in cell and cluster shape, as well as intra-  
 318 cluster cell rearrangements, that are typical of multicellular  
 319 migration in larger dimensions. Therefore, we use the two-  
 320 dimensional CPM to investigate these aspects next.

## 321 Cellular Potts model exhibits optimal cell-cell 322 and cell-ECM adhesion

323 To capture more realistic motion of cells in two dimensions,  
 324 we use the CPM (Methods). We plot the migration velocity  
 325 for a cluster of nine cells in the phase space of  $\alpha$ , which  
 326 represents the energy penalty for cell-ECM contact, and  
 327  $\gamma$ , which represents the energy penalty for cell-cell contact  
 328 (see Fig. 3A). We see a clear optimum in regime ii (red),  
 329 corresponding to intermediate  $\alpha$  and  $\gamma$ . We have checked  
 330 that the existence and location of the optimum is not strongly  
 331 dependent on the number of cells in the system. Thus, not  
 332 only is there an optimal cell-cell adhesion strength ( $\gamma$ ) as  
 333 found in the one-dimensional model, there is also an optimal  
 334 cell-ECM adhesion strength ( $\alpha$ ).

335 The reason for the optimum is illustrated in Fig. 3B. At

U. Roy and A. Mugler

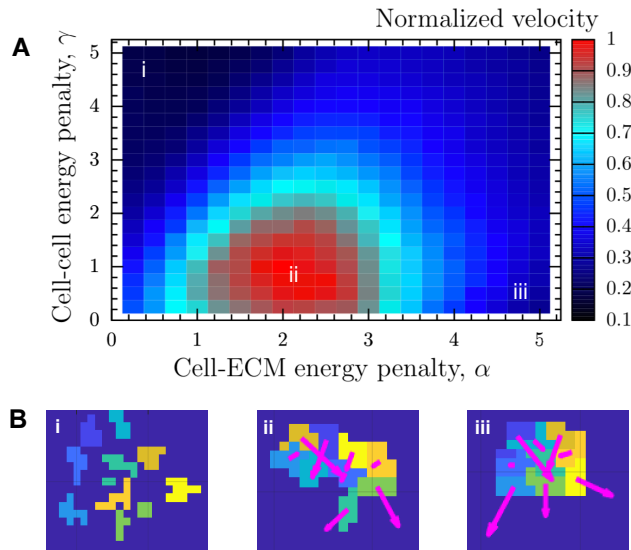

**Figure 3: Velocity vs. intercellular and cell-ECM adhesion strengths for two-dimensional collective cell migration.** A. Normalized center-of-mass velocity vs. cell-ECM energy penalty  $\alpha$  and cell-cell energy penalty  $\gamma$ . Velocity is maximal in region ii. Velocity is computed after 20,000 Monte Carlo steps and averaged over 200 trials for each value of  $\alpha$  and  $\gamma$ . B. Snapshots from simulation of a cluster of nine cells, illustrating the cluster configuration while migrating, corresponding to different regimes in the parameter space: (i) cells scatter and diffuse away, (ii) cells remain connected with intermediate adhesion, and (iii) cells tightly adhere to one another forming a compact structure.

low  $\alpha$  and high  $\gamma$  (region i), cells adhere to the ECM but not each other. Therefore, they scatter and do not benefit from the collective determination of the gradient direction, resulting in a low velocity. At high  $\alpha$  and low  $\gamma$  (region iii), cells adhere to each other but prefer to avoid contact with the ECM. The latter prevents protrusions from forming, also resulting in a low velocity. Region ii optimally negotiates this tradeoff.

Although Fig. 3 demonstrates the existence of optimal adhesion strengths, it does not directly address the question of what properties of the clusters correspond to this optimum. As these properties could lead to experimental predictions and further reveal the physical mechanisms behind optimal collective migration, we explore this question next.

### Optimum arises from intact but maximally fluid clusters

We first hypothesized that the optimal migration velocity corresponds to the transition between a fully connected cluster and multiple disconnected sub-clusters (Fig. 4A). Such a transition occurs when  $\gamma \approx 2\alpha$ . The reason is that two cell edges that are in contact with each other will have an energy cost of  $\gamma$ , whereas if these two edges are exposed to the ECM they will have an energy cost of  $2\alpha$ . Thus  $\gamma < 2\alpha$  will promote cell scattering, while  $\gamma > 2\alpha$  will promote cluster cohesion.

Fig. 4B confirms the transition: we see in Fig. 4B that to the left of the line  $\gamma = 2\alpha$  (dashed) the mean sub-cluster size is less than the total cell number of 9 cells, whereas to the right of the line it converges to 9 cells. Indeed, in the inset of Fig. 4B we see that far to the left of the transition (region i), the sub-cluster size distribution is broad, with significant probability to observe sub-clusters of size less than nine, including isolated cells of size one. In contrast, far to the right of the transition (region vi), we see that the sub-cluster size distribution has support only at nine, meaning all cells remain intact throughout the migration.

The optimal velocity occurs in region ii of Fig. 3A which corresponds to region vi of Fig. 4B (dashed circle), which is far from the connectedness transition. Evidently, being relatively deep within the fully connected regime is optimal for maximal cluster velocity. Therefore, being at the transition between connected and disconnected cannot explain the optimum observed in our model.

We next hypothesized that the optimal migration velocity corresponds to the ability of the cluster to extend maximally in the gradient direction while remaining intact (Fig. 5A). Maximal extension would allow the cluster to span the largest distance in the gradient direction, meaning that the concentration difference between the front (or back) cell and the cluster center-of-mass would be largest. This would result in the largest force exerted by these cells via Eq. (10). We quantify extension using the cluster aspect ratio (AR): the ratio of the length of the cluster parallel vs. perpendicular to the gradient direction. We see in Fig. 5B that the average aspect ratio indeed varies as a function of the adhesion parameters  $\alpha$  and

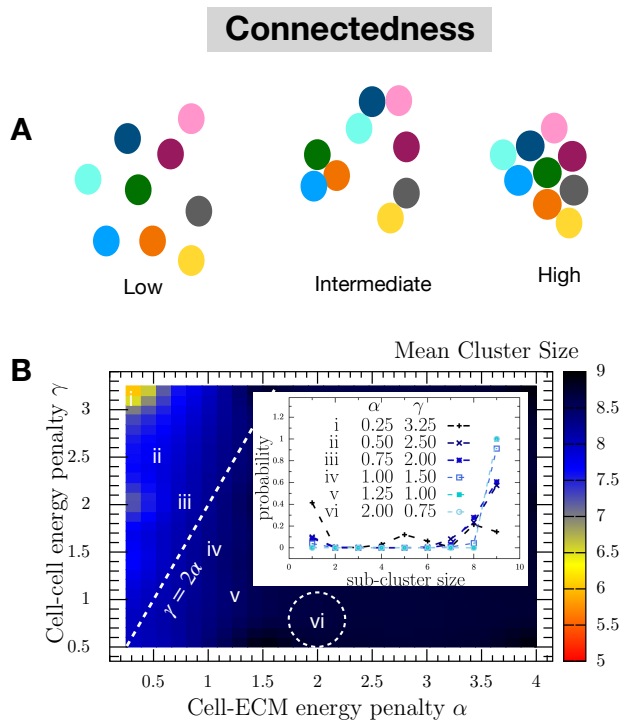

**Figure 4: Connectedness transition does not account for maximal cluster velocity.** A. Schematic illustrating low, intermediate, and high connectedness. B. Mean cluster size vs.  $\alpha$  and  $\gamma$  for 9 cells. Cells transition from disconnected to connected when  $\alpha > 2\gamma$ , as predicted, which is far from where velocity is maximal (dashed circle). Inset: Sub-cluster size distribution for different values of  $\alpha$  and  $\gamma$  (as shown by i-vi in A) clearly exhibits a transition from multiple sub-clusters to a single cluster of size nine. Sub-cluster sizes are computed over 10,000 Monte Carlo steps for each value of  $\alpha$  and  $\gamma$ .

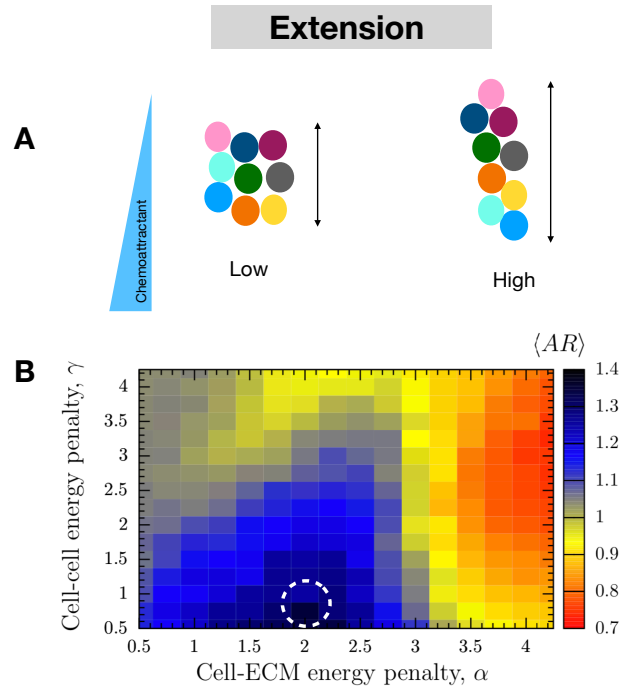

**Figure 5: Extension in gradient direction correlates with cluster velocity.** A. Schematic illustrating low and high cluster extension in the gradient direction, which we quantify by the aspect ratio ( $AR$ ). B. Mean aspect ratio  $\langle AR \rangle$  vs.  $\alpha$  and  $\gamma$  exhibits maximum in same location as maximal cluster velocity (dashed circle). Aspect ratio is computed over 20,000 Monte Carlo steps and averaged over 200 trials for each value of  $\alpha$  and  $\gamma$ .

U. Roy and A. Mugler

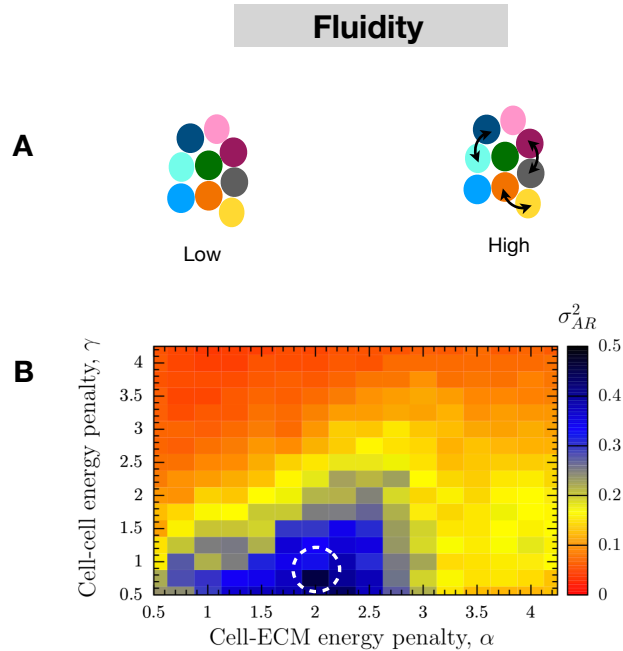

Figure 6: **Cluster fluidity correlates with cluster velocity.** A. Schematic illustrating low and high fluidity. High fluidity corresponds to cell rearrangement and changes in overall cluster shape, which we quantify using the variance of the aspect ratio. B. Variance of the aspect ratio vs.  $\alpha$  and  $\gamma$  exhibits maximum in same location as maximal cluster velocity (dashed circle). Aspect ratio is computed over 20,000 Monte Carlo steps, and variance is computed over 200 trials for each value of  $\alpha$  and  $\gamma$ .

$\gamma$ , and that a maximum is observed (dark blue) corresponding to extension parallel to the gradient direction ( $\langle AR \rangle > 1$ ). The location of this maximum corresponds to that of the maximal velocity (dashed circle in Fig. 5B). We conclude that maximal cluster extension leads to maximal migration velocity.

The maximal average extension observed in Fig. 5B could occur in multiple different ways. One possibility is that the cluster relaxes to a maximally extended shape and stays in this shape throughout the course of the migration. An alternative possibility is that the cluster is fluid, with cells free to rearrange while the cluster remains intact (Fig. 6A). Previous studies have shown that fluidity determines the properties of a jamming transition in confluent sheets (33), and that more fluid multicellular clusters can be more effective gradient sensors (34). If the cluster is fluid, motility forces would then drive the cluster into a maximally extended shape on average, but many shapes could be visited throughout the migration process. We therefore expect the two possibilities of a rigid or a fluid cluster to have low or high variability in the aspect ratio, respectively.

To distinguish between these two possibilities, we define

fluidity using the variance in the aspect ratio,  $\sigma_{AR}^2$ . Fig. 6B plots  $\sigma_{AR}^2$  as a function of  $\alpha$  and  $\gamma$ . We see that it has a maximum at the same location of the optima in the migration velocity and the cluster extension (dashed circle). Thus, maximal velocity corresponds not to a cluster that is rigidly extended in the gradient direction, but to a cluster that is maximally fluid: extended on average, but freely exploring the space of cluster shapes as migration proceeds. This maximal fluidity is enabled at intermediate adhesion strengths: sufficiently strong to keep cells intact as a fully connected cluster, but sufficiently weak to allow maximal variability in cluster shape.

## DISCUSSION

We have developed a model to investigate the role of cell-cell and cell-ECM adhesion in determining the migration velocity of multicellular clusters. In our model, migration is (i) collective, based on contact inhibition of locomotion, and (ii) directed, due to the presence of an external gradient. In its simplest form—point-like cells in one dimension—we have mapped the model to the lattice gas model of statistical physics, which affords analytic results for the migration velocity. We have seen that an optimal cell-cell adhesion strength emerges that maximizes migration velocity, and that this optimum depends on the interplay between the motility forces and the configurational statistics of the cells. In its more realistic form—spatially extended cells embedded in ECM in two dimensions—we have seen that the optimum exists for both cell-cell and cell-ECM adhesion strengths. Clusters with intermediate adhesion are fastest because they are the most fluid: they are intact, extended in the gradient direction, and maximally variable in cluster shape.

Our prediction that there exist optimal cell-cell and cell-ECM adhesion strengths could be tested experimentally. Experiments suggest that both cell-cell and cell-ECM adhesion are crucial for tumor invasion, as well as for homeostasis in healthy tissues (35). Experimental perturbations could be used to modulate cadherin or integrin levels to tune cell-cell or cell-ECM adhesion respectively, and the effects on migration velocity could be investigated. For example, downregulation of E-cadherin within a tumor spheroid was recently achieved by introduction of interstitial flow, which was subsequently seen to promote tumor invasion (36).

Our observation that variability in aspect ratio correlates with migration velocity could also serve as a phenomenological signature to look for in experiments. Variability in cluster shape is straightforward to extract from microscopy videos and quantify, and it abstracts away the underlying molecular details of the adhesion or migration. It would be interesting to see whether the fastest clusters are generically the most fluid across biological systems, regardless of the nature of the molecular perturbation applied.

We have considered only one- and two-dimensional migration, whereas three-dimensional migration is clearly prevalent,



rich in its modalities (e.g., mesenchymal, amoeboid, lobopodial), and dependent on tunable factors (e.g., adhesion, cell confinement, contractility, deformability, proteolytic capacity) (37–39). It would be possible in the future to extend our model to three dimensions to investigate some of these factors and migration modes. Nonetheless, important examples of 1D and 2D migration exist, to which our findings may more directly apply. Examples of 1D or quasi-1D migration include preferential migration of tumor cells, cancer stem cells, and leukocytes along a bundle of linear collagen fibrils (40, 41), as well as migration of fibroblasts on 1D fibril-like lines (37, 42). Examples of 2D or quasi-2D migration include wound healing (or gap closure) in an epithelial tissue, cells migrating on a bone, migration of single epithelial cells along 2D sheets of basement membranes, and patrolling of leukocytes along the luminal surface of blood vessels (43–46).

Our observation that cluster fluidity maximizes migration velocity is a purely mechanical effect: intermediate adhesion promotes cluster configurations that maximize net motility forces in the gradient direction. Previous work has also shown that cluster fluidity improves gradient sensing due to a different mechanism: fluidity averages out detection noise due to cell-to-cell variability (34). We do not consider detection noise (5, 23, 34) or cell-to-cell variability (34) here. It would be interesting to investigate how these distinct advantages of cluster fluidity act in concert or whether they combine synergistically.

The model developed here is generic, minimal, and not specific to any particular cell type. In general, there can be more than one cell type within a single cluster. In that case, it is straightforward to extend our model to include a set of cell-cell interaction parameters  $\gamma_{ij}$  between every pair of cell types  $i$  and  $j$ , or a set of cell-ECM interaction parameters  $\alpha_k$  for each cell type. We have considered only the simplest version of this scenario here, but it may be interesting in the future to generalize our work to systems that exhibit heterogeneous collective migration.

## AUTHOR CONTRIBUTIONS

UR and AM designed and performed the research. UR contributed analytic tools and analyzed data. UR and AM wrote the manuscript.

## ACKNOWLEDGMENTS

UR thanks Michael Vennettilli for valuable inputs in the analytical treatment. UR acknowledges helpful discussions with Raj Kumar Manna and Saikat Sinha regarding computational techniques. This work was supported by Simons Foundation Grant No. 376198.

## REFERENCES

1. Collins C. and W. J. Nelson. 2015. Running with neighbors: coordinating cell migration and cell-cell adhesion *Curr. Op. Cell Biol.* 36:62-70.

2. Friedl P. and D. Gilmour. 2009. Collective cell migration in morphogenesis, regeneration and cancer. *Nat. Rev.* 10:445-457.
3. Anona E., X. Serra-Picamal, P. Hersen, N. C. Gauthier, M. P. Sheetz, X. Trepas, and B. Ladoux. 2012. Cell crawling mediates collective cell migration to close undamaged epithelial gaps. *Proc. Natl. Acad. Sci. USA.* 109:10891-10896.
4. Theveneau, E., L. Marchant, S. Kuriyama, M. Gull, B. Moepps, M. Parsons, and R. Mayor. 2010. Collective chemotaxis requires contact-dependent cell polarity. *Dev. Cell.* 19:39-53.
5. Ellison D., A. Mugler, M. D. Brenna, S. H. Leeb, R. J. Huebner, E. R. Shamir, L. A. Woo, J. Kim, P. Amaral, I. Nemenman, A. J. Ewalde, and A. Levchenko. 2016. Cell-cell communication enhances the capacity of cell ensembles to sense shallow gradients during morphogenesis. *Proc. Natl. Acad. Sci. USA.* 113:E679–E688
6. Mayor, R., and C. Carmona-Fontaine. 2010. Keeping in touch with contact inhibition of locomotion. *Trends Cell Biol.* 20: 319-328.
7. Pokutta S. and W. I. Weis. 2007. Structure and mechanism of cadherins and catenins in cell-cell contacts. *Annu. Rev. Cell. Dev. Biol.* 23:237-261.
8. Zamir E. and B. Geiger. 2001. Molecular complexity and dynamics of cell-matrix adhesions. *J. Cell Sci.* 114:3583-3590.
9. Canel M., A. Serrels, M. C. Frame, and V. G. Brunton. 2013. E-cadherin-integrin crosstalk in cancer invasion and metastasis *J. Cell Sci.* 126: 393-401.
10. Richardson, J., A. Gauert, L. B. Montecinos, L. Fanlo, Z. M. Alhashem, R. Assar, E. Marti, A. Kabla, S. Härtel, and C. Linker. 2016. Leader cells define directionality of trunk, but not cranial, neural crest cell migration. *Cell. Rep.* 15: 2076-2088.
11. Agata Fronczak. 2013. Cluster properties of the one-dimensional lattice gas: the microscopic meaning of grand potential. *Phys. Rev. E* 87: 022131.
12. Graner F. and J. A. Glazier. 1992. Simulation of Biological Cell Sorting Using a Two-Dimensional Extended Potts Model. *Phys. Rev. Lett.* 69: 2013.
13. Glazier J. A. and F. Graner. 1993. Simulation of the differential adhesion driven rearrangement of biological cells. *Phys. Rev. E* 47: 2128.
14. Camley B. A. and W-J Rappel. 2017. Physical models of collective cell motility: from cell to tissue. *J. Phys. D: App. Phys.* 50: 113002.

U. Roy and A. Mugler

- 560 15. Agata Fronczak. 2012. Microscopic meaning of grand 605  
561 potential resulting from combinatorial approach to a 606  
562 general system of particles. *Phys. Rev. E* 86: 041139. 607  
608
- 563 16. Ermentrout, G. B. and L. Edelstein-Keshet. 1993. Cel- 609  
564 lular automata approaches to biological modeling. *J.* 610  
565 *Theor. Biol.* 160:97-133. 611
- 566 17. Maire, T. and H. Youk. 2015. Molecular-level tuning of 612  
567 cellular autonomy controls the collective behaviors of 613  
568 cell populations. *Cell Syst.* 1:349-360. 614
- 569 18. Mente, C., A. Voss-Böhme, and A. Deutsch. 2015. 615  
570 Analysis of individual cell trajectories in lattice-gas 616  
571 cellular automaton models for migrating cell populations. 617  
572 *Bull. Math. Biol.* 77:660-697. 618
- 573 19. Szabó, A., R., Ünnepp, E. Méhes, W. O. Twal, W. S. 619  
574 Argraves, Y. Cao, and A. Czirók. 2010. Collective cell 620  
575 motion in endothelial monolayers. *Phys. Biol.* 7:046007. 621
- 576 20. Albert P. J. and U. S. Schwarz. 2016. Dynamics of Cell 622  
577 Ensembles on Adhesive Micropatterns: Bridging the 623  
578 Gap between Single Cell Spreading and Collective Cell 624  
579 Migration. *PLoS Comput. Biol.* 12:e1004863. 625
- 580 21. Kabla, A. J. 2012. Collective cell migration: leader- 626  
581 ship, invasion and segregation. *J. R. Soc. Interface.* 627  
582 9:3165–3183. 628
- 583 22. Maclaren, O. J., H. M. Byrne, A. G. Fletcher, and P. 629  
584 K. Maini. 2015. Models, measurement and inference 630  
585 in epithelial tissue dynamics. *Math. Biosci. Eng.* 12 631  
586 (6):1321-1340. 632
- 587 23. Varennes, J. and B. Han, A. Mugler. 2016. Collective 633  
588 Chemotaxis through Noisy Multicellular Gradient Sens- 634  
589 ing. *Biophys. J.* 111: 640-649. 635
- 590 24. Carmona-Fontaine C., H. K. Matthews, S. Kuriyama, 636  
591 M. Moreno, G. A. Dunn, M. Parsons, C. D. Stern, and 637  
592 R. Mayor. 2008. Contact inhibition of locomotion in 638  
593 vivo controls neural crest directional migration. *Nature* 639  
594 (*London*) 456: 957. 640
- 595 25. Desai R. A., S. B. Gopal, S. Chen, and C. S. Chen. 641  
596 2013. Contact inhibition of locomotion probabilities 642  
597 drive solitary versus collective cell migration. *J. R. Soc.* 643  
598 *Interface* 10: 20130717. 644
- 599 26. Bianco A., M. Poukkula, A. Cliffe, J. Mathieu, C. M. 645  
600 Luque, T. A. Fulga, and P. Rørth. 2007. Two distinct 646  
601 modes of guidance signalling during collective migra- 647  
602 tion of border cells. *Nature (London)* 448: 362. 648
- 603 27. Rørth P. 2007. Collective guidance of collective cell 649  
604 migration. *Trends Cell Biol.* 17: 575. 650
- 605 28. Inaki M., S. Vishnu, A. Cliffe, and P. Rørth. 2012. 651  
606 Effective guidance of collective migration based on 652  
607 differences in cell states. *Proc. Natl. Acad. Sci. U.S.A.* 653  
608 109: 2027. 654
- 609 29. Wang X., L. He, Y. I. Wu, K. M. Hahn, and D. J. Montell. 655  
610 2010. Light-mediated activation reveals a key role for 656  
611 Rac in collective guidance of cell movement in vivo. 657  
612 *Nat. Cell Biol.* 12: 591. 658
- 613 30. Malet-Engra G., W. Yu, A. Oldani, J. Rey-Barroso, N. 659  
614 S. Gov, G. Scita, and L. Dupré. 2015. Collective cell 660  
615 motility promotes chemotactic prowess and resistance 661  
616 to chemorepulsion. *Curr. Biol.* 25: 242. 662
- 617 31. Camley, B. A., J. Zimmerman, H. Levine, and W.-J. 663  
618 Rappel. 2016. Collective signal processing in cluster 664  
619 chemotaxis: roles of adaptation, amplification, and co- 665  
620 attraction in collective guidance. *PLoS Comput. Biol.* 666  
621 12(7): e1005008 667
- 622 32. Camley, B. A., J. Zimmerman, H. Levine, and W.-J. 668  
623 Rappel. 2016. Emergent Collective Chemotaxis with- 669  
624 out Single-Cell Gradient Sensing. *Phys. Rev. Lett.* 670  
625 116:098101. 671
- 626 33. Dapeng B., X. Yang, M. C. Marchetti, and M. L. Man- 672  
627 ning. 2016. Motility-Driven Glass and Jamming Transi- 673  
628 tions in Biological Tissues. *Phys. Rev. X* 6: 021011. 674
- 629 34. Camley B. A. and W.-J. Rappel. 2017. Cell-to-cell 675  
630 variation sets a tissue-rheology-dependent bound on 676  
631 collective gradient sensing. *Proc. Natl. Acad. Sci.* 114 677  
632 (47): E10074-E10082. 678
- 633 35. Janiszewska M., M. C. Primi, and T. Izard. 2020. Cell 679  
634 adhesion in cancer: Beyond the migration of single cells. 680  
635 *J. Biol. Chem.* 295(8):2495-2505. 681
- 636 36. Huang Y. L., Y. Ma, C. Wu, C. Shiao, J. E. Segall, and M. 682  
637 M. Wu. 2020. Tumor spheroids under perfusion within a 683  
638 3D microfluidic platform reveal critical roles of cell-cell 684  
639 adhesion in tumor invasion. *Sci. Rep.* 10:9648. 685
- 640 37. Yamada K. M. and M. Sixt. 2019. Mechanisms of 3D 686  
641 cell migration. *Nat. Rev.* 20: 738-752. 687
- 642 38. Liu Y. J. et al. 2015. Confinement and low adhesion 688  
643 induce fast amoeboid migration of slow mesenchymal 689  
644 cells. *Cell* 160: 659-672. 690
- 645 39. Callan-Jones A. C. and R. Voituriez. 2016. Actin flows 691  
646 in cell migration: from locomotion and polarity to tra- 692  
647 jectories. *Curr. Opin. Cell Biol.* 38, 12-17. 693
- 648 40. Provenzano P. P., K. W. Eliceiri, J. M. Campbell, D. 694  
649 R. Inman, J. G. White, and P. J. Keely. 2006. Collagen 695  
650 reorganization at the tumor-stromal interface facilitates 696  
651 local invasion. *BMC Med.* 4: 38. 697

- 652 41. Boissonnas A., L. Fetler, I. S. Zeelenberg, S. Hugues,  
653 and S. Amigorena. 2007. In vivo imaging of cytotoxic T  
654 cell infiltration and elimination of a solid tumor. *J. Exp.*  
655 *Med.* 204, 345-356.
- 656 42. Doyle A. D., F. W. Wang, K. Matsumoto, and K. M.  
657 Yamada. 2009. One-dimensional topography underlies  
658 three-dimensional fibrillar cell migration. *J. Cell Biol.*  
659 184, 481-490.
- 660 43. B. Weigel, G. J. Bakker and P. Friedl. 2012. Intravital  
661 third harmonic generation microscopy of collective  
662 melanoma cell invasion: Principles of interface guidance  
663 and microvesicle dynamics. *Intravital* 1: 32-43.
- 664 44. Fisher G., and L. Rittie. 2018. Restoration of the base-  
665 ment membrane after wounding: a hallmark of young  
666 human skin altered with aging. *J. Cell Commun. Signal*  
667 12: 401-411.
- 668 45. Hsu J. C., Hyun K., J. S. Harunaga, K. Matsumoto, A.  
669 D. Doyle, and K. M. Yamada 2013. Region-specific ep-  
670 ithelial cell dynamics during branching morphogenesis.  
671 *Dev. Dyn.* 242: 1066-1077.
- 672 46. Auffray C., D. Fogg, M. Garfa, G. Elain, O. Join-  
673 Lambert, S. Kayal, S. Sarnacki, A. Cumano, G. Lauvau,  
674 and F. Geissmann. 2007. Monitoring of blood vessels  
675 and tissues by a population of monocytes with patrolling  
676 behavior. *Science* 317: 666-670.
